# Supplementary material for: Ecological plasticity and commercial impact of invasive marbled crayfish populations in Madagascar
Source: PubMed Central journal article supplement (PMC6366054; doi:10.1186/s12898-019-0224-1), 2019-02-06
Supplement: 12898_2019_224_MOESM1_ESM.pdf [file 12898_2019_224_MOESM1_ESM.pdf]

Table S1. Overview of marbled crayfish populations analyzed.

| Location     | Site name    | Coordinates                | Habitat    | Collection depth (cm) | Ground sediment |
|--------------|--------------|----------------------------|------------|-----------------------|-----------------|
| Tamatave     | Ampasimpotsy | S18°09.925'<br>E49°21.925' | pond       | 50-120                | mud             |
| Antsirabe    | Ranomaimbo   | S19°52.226'<br>E47°01.791' | lake       | 50-100                | mud             |
| Fianarantsoa | Andraganroa  | S21°17.551'<br>E47°22.292' | river      | 50-100                | mud             |
| Ihosal       | Ihosal       | S22°22.512'<br>E46°06.016' | river      | 100-150               | mud             |
| Bezaha       | Anjingilo    | S23°30.674'<br>E44°29.658' | rice field | 10-20                 | mud             |

Table S2. Marbled crayfish-associated vegetation.

| Site name    | Family         | Genus                      | Common name        |
|--------------|----------------|----------------------------|--------------------|
| Ampasimpotsy | Poaceae        | <i>Paspalum conjugatum</i> | Herbaceous grasses |
|              | Pontederiaceae | <i>Salvinia</i> sp.        | Macrophyte         |
| Ranomaimbo   | Poaceae        | <i>Paspalum conjugatum</i> | Herbaceous grasses |
|              |                | <i>Oriza</i> spp.          | Rice               |
|              |                | <i>Phragmites</i> sp.      | Phragmites         |
|              | Pontederiaceae | <i>Eichhornia</i> sp.      | Macrophyte         |
| Andraganroa  | Poaceae        | <i>Paspalum conjugatum</i> | Herbaceous grasses |
|              |                | <i>Oriza</i> spp.          | Rice               |
|              | Cyperaceae     | <i>Cyperus latifolius</i>  | Herbaceous grasses |
| Ihosal       | Poaceae        | <i>Paspalum conjugatum</i> | Herbaceous grasses |
|              |                | <i>Phragmites</i> sp.      | Phragmites         |
| Anjingilo    | Poaceae        | <i>Paspalum conjugatum</i> | Herbaceous grasses |
|              |                | <i>Oriza</i> spp.          | Rice               |

Table S3. Marbled crayfish-associated fauna.

| Site name                      | Family         | Genus                                     | Common name    |
|--------------------------------|----------------|-------------------------------------------|----------------|
| Ampasimpotsy                   | Cichlidae      | <i>Oreochromis</i> sp.                    | tilapia (fish) |
|                                | Channidae      | <i>Channa striata</i>                     | snakehead fish |
|                                | Poeciliidae    | <i>Gambusia</i> sp.                       | mosquitofish   |
|                                | Odonata        |                                           | dragonfly      |
| Ranomaimbo                     | Cichlidae      | <i>Oreochromis</i> sp.                    | tilapia (fish) |
|                                | Coleoptera     |                                           | beetle         |
| Andragaroa                     | Potamonautidae | <i>Hydrotelphusa agilis</i>               | crab           |
|                                | Parastacidae   | <i>Astacoides betsiloensis</i> (red type) | crayfish       |
|                                |                | <i>Astacoides granulimanus</i>            | crayfish       |
|                                |                | <i>Xiphophorus hellerii</i>               | small fish     |
|                                | Unidentified   |                                           | tadpole        |
| Coleoptera, Hemiptera, Odonata |                | insects                                   |                |
| Ihosy                          | Cyprinidae     | <i>Carassius auratus</i>                  | goldfish       |
|                                | Cichlidae      | <i>Oreochromis niloticus</i> .            | tilapia (fish) |
|                                | Poeciliidae    | <i>Gambusia holbrooki</i>                 | mosquitofish   |
|                                |                | <i>Xiphophorus hellerii</i>               | small fish     |
|                                | Thiaridae      | <i>Melanoides</i> sp.                     | mollusc        |
|                                | Ranidae        | <i>Aglyptodactylus madagascariensis</i>   | frog           |
|                                | Unidentified   |                                           | tadpole        |
|                                | Atyidae        | Unidentified                              | shrimp         |
|                                | Potamonautidae | Unidentified                              | crab           |
| Coleoptera, Hemiptera, Odonata |                | insects                                   |                |
| Anjingilo                      | Cichlidae      | <i>Oreochromis</i> sp.                    | (tilapia) fish |
|                                | Poeciliidae    | <i>Gambusia holbrooki</i>                 | mosquitofish   |
|                                | Unidentified   |                                           | tadpole        |
|                                | Coleoptera     |                                           | beetle         |
