# Supplementary material for: Ecological plasticity and commercial impact of invasive marbled crayfish populations in Madagascar
Source: BMC Ecol. 2019 Feb 6;19:8. doi: 10.1186/s12898-019-0224-1 (PMC6366054; doi:10.1186/s12898-019-0224-1)
Supplement: Supplementary file 2 — Additional file 2. DNA sequencing data. [file 12898_2019_224_MOESM2_ESM.pdf]

[illegible][illegible][illegible]

|      |         |        |       |       |     |       |        |       |       |    |
|------|---------|--------|-------|-------|-----|-------|--------|-------|-------|----|
| 226  | TATGAAC | TGGGGT | TACTA | AGGGG | TTT | GCTGG | GATGAA | GTTAT | CTGGG | TC |
| otsy | TATGAAC | TGGGGT | TACTA | AGGGG | TTT | GCTGG | GATGAA | GTTAT | CTGGG | TC |
|      | TATGAAC | TGGGGT | TACTA | AGGGG | TTT | GCTGG | GATGAA | GTTAT | CTGGG | TC |
|      | TATGAAC | TGGGGT | TACTA | AGGGG | TTT | GCTGG | GATGAA | GTTAT | CTGGG | TC |
| mb   | TATGAAC | TGGGGT | TACTA | AGGGG | TTT | GCTGG | GATGAA | GTTAT | CTGGG | TC |
|      | TATGAAC | TGGGGT | TACTA | AGGGG | TTT | GCTGG | GATGAA | GTTAT | CTGGG | TC |
|      | TATGAAC | TGGGGT | TACTA | AGGGG | TTT | GCTGG | GATGAA | GTTAT | CTGGG | TC |
| aro  | TATGAAC | TGGGGT | TACTA | AGGGG | TTT | GCTGG | GATGAA | GTTAT | CTGGG | TC |
|      | TATGAAC | TGGGGT | TACTA | AGGGG | TTT | GCTGG | GATGAA | GTTAT | CTGGG | TC |
|      | TATGAAC | TGGGGT | TACTA | AGGGG | TTT | GCTGG | GATGAA | GTTAT | CTGGG | TC |
| nosy | TATGAAC | TGGGGT | TACTA | AGGGG | TTT | GCTGG | GATGAA | GTTAT | CTGGG | TC |
|      | TATGAAC | TGGGGT | TACTA | AGGGG | TTT | GCTGG | GATGAA | GTTAT | CTGGG | TC |
|      | TATGAAC | TGGGGT | TACTA | AGGGG | TTT | GCTGG | GATGAA | GTTAT | CTGGG | TC |
| nglo | TATGAAC | TGGGGT | TACTA | AGGGG | TTT | GCTGG | GATGAA | GTTAT | CTGGG | TC |
|      | TATGAAC | TGGGGT | TACTA | AGGGG | TTT | GCTGG | GATGAA | GTTAT | CTGGG | TC |
|      | TATGAAC | TGGGGT | TACTA | AGGGG | TTT | GCTGG | GATGAA | GTTAT | CTGGG | TC |
